# Supplementary material
Source: Springer Nature journal article supplement (https://www.springermedizin.de/resource/supplementary/13058_2007_1754_MOESM10_ESM.pdf/9699844)

# Supplementary Figure 2

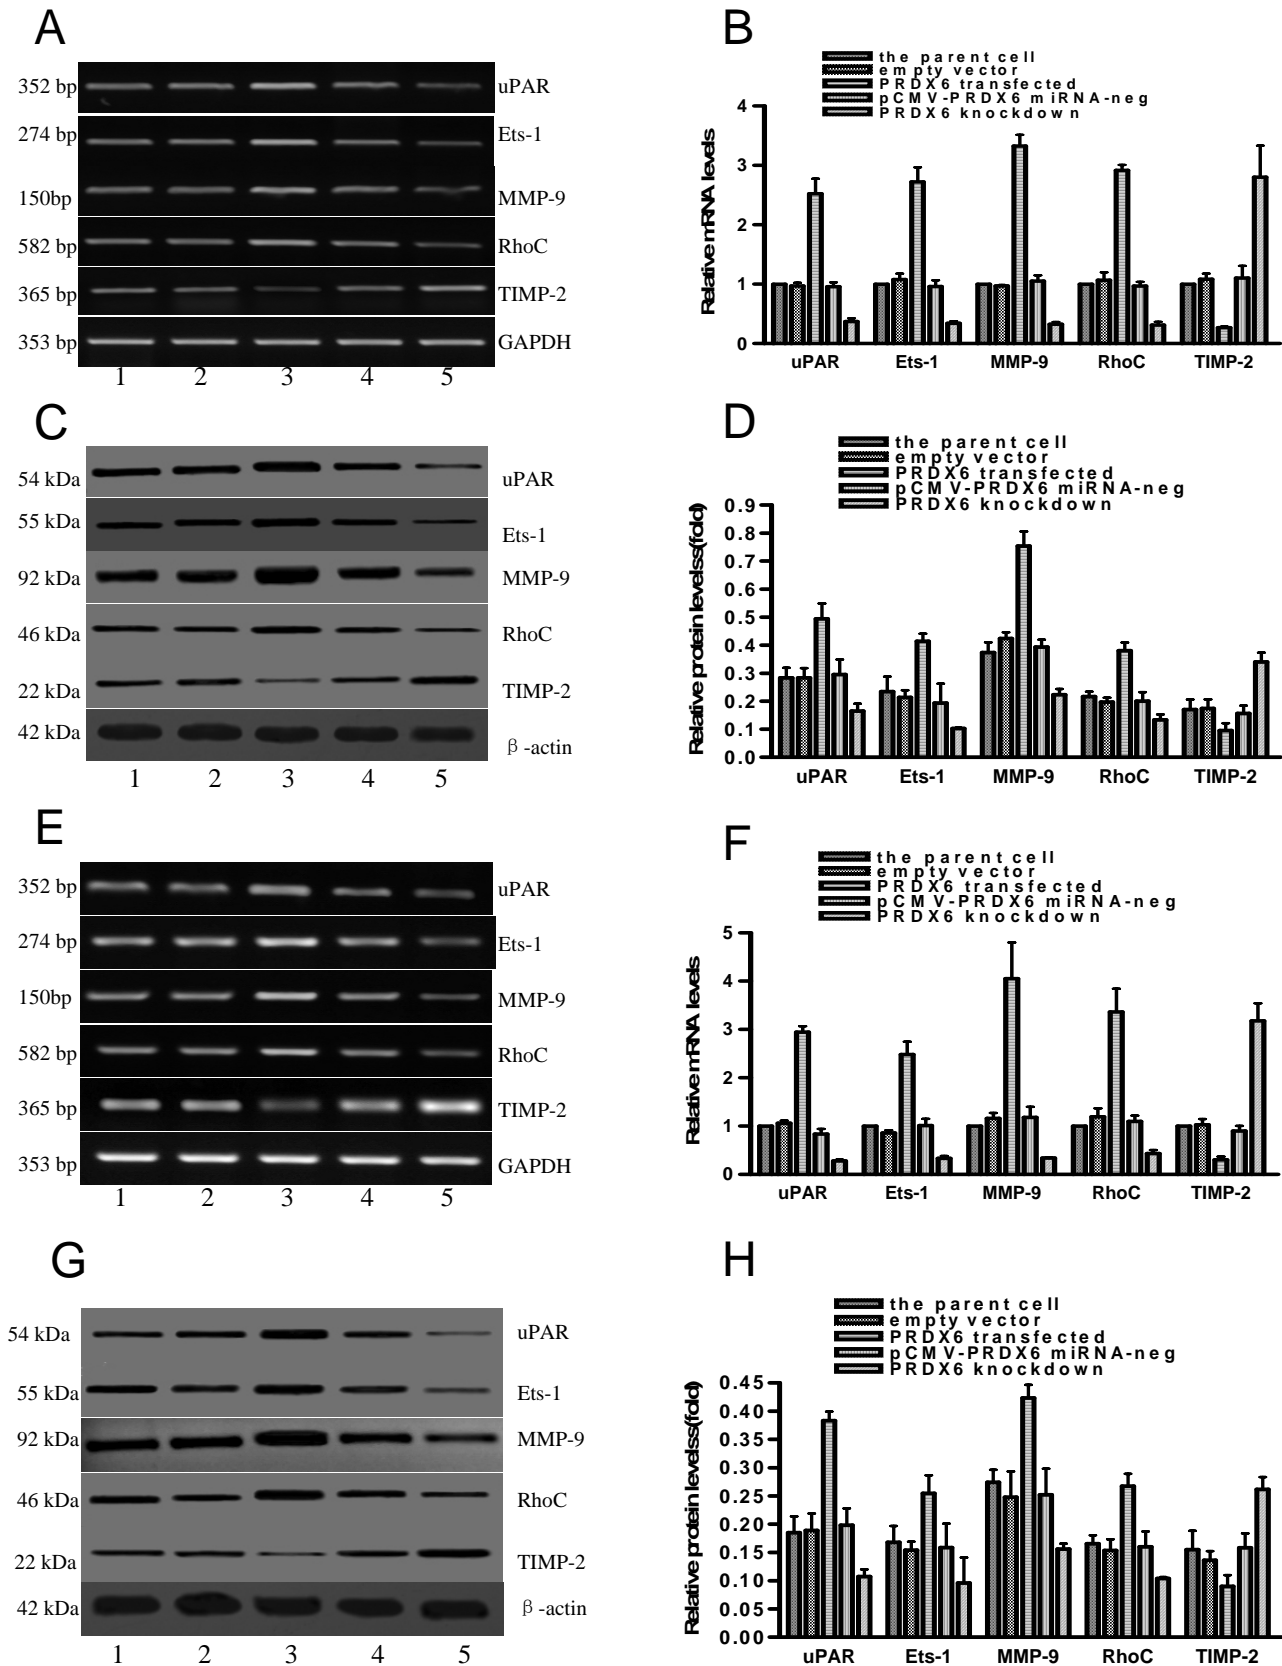

Supplement: MOESM10 [file 9699844]
